# Supplementary material for: SARS-CoV-2 ORF8 drives osteoclastogenesis in preexisting immune-mediated inflammatory diseases
Source: JCI journal article supplement (doi:10.1172/jci.insight.178820), 2024-12-19
Supplement: sd1 [file 1]

## Supplemental Figures and Tables

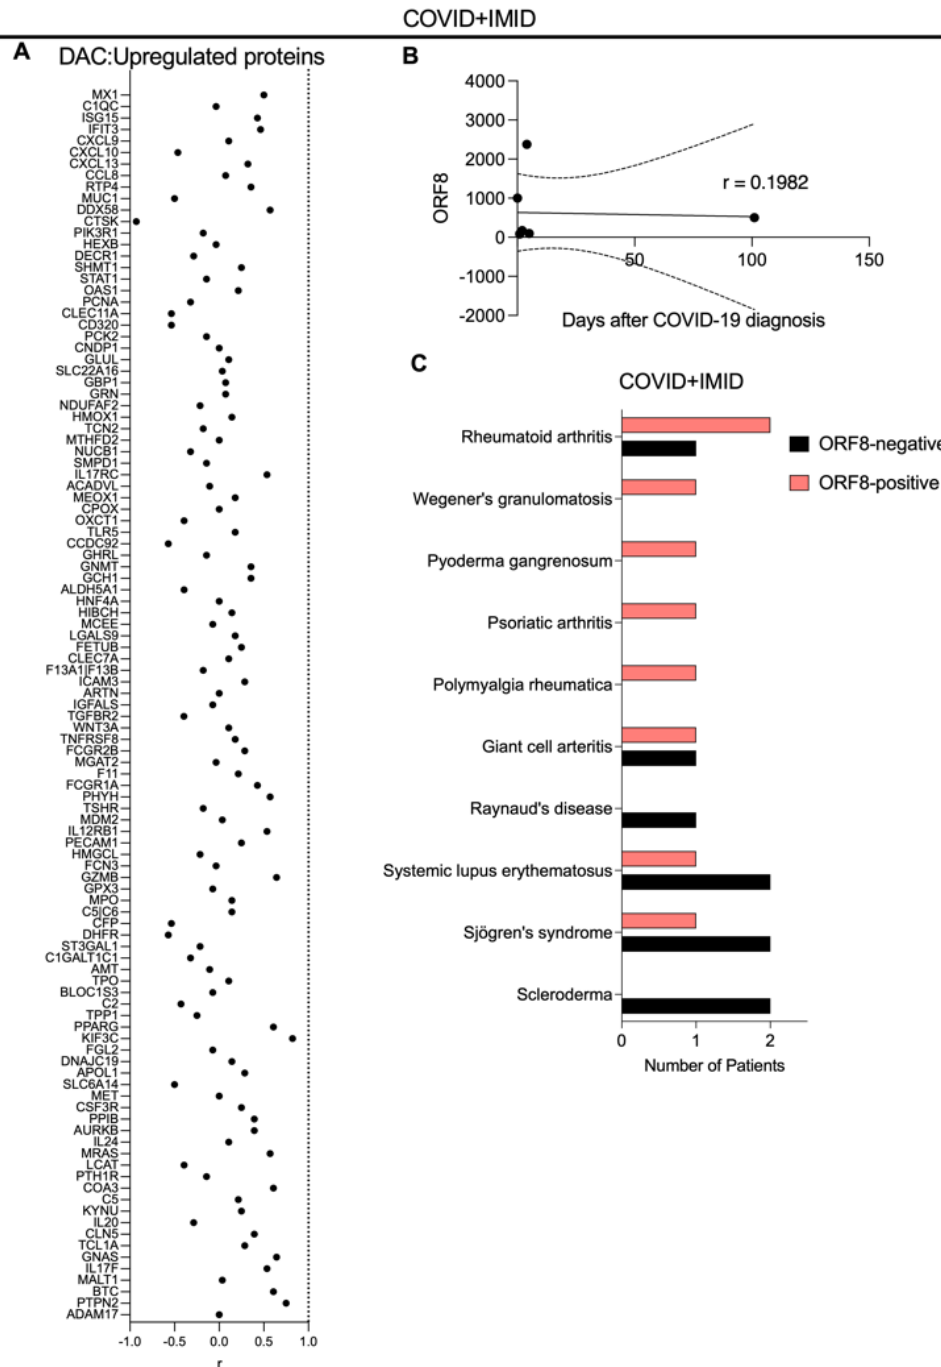

**Supplemental figure 1. Correlation between protein levels, time of collection, ORF8 levels and IMID conditions. (A and B)** Spearman's correlation analysis between days after COVID-19 diagnosis (DAC) with significantly upregulated proteins (A) and ORF8 (B) in the COVID+IMID group. (C) IMID conditions and ORF8 positivity in COVID+IMID group.

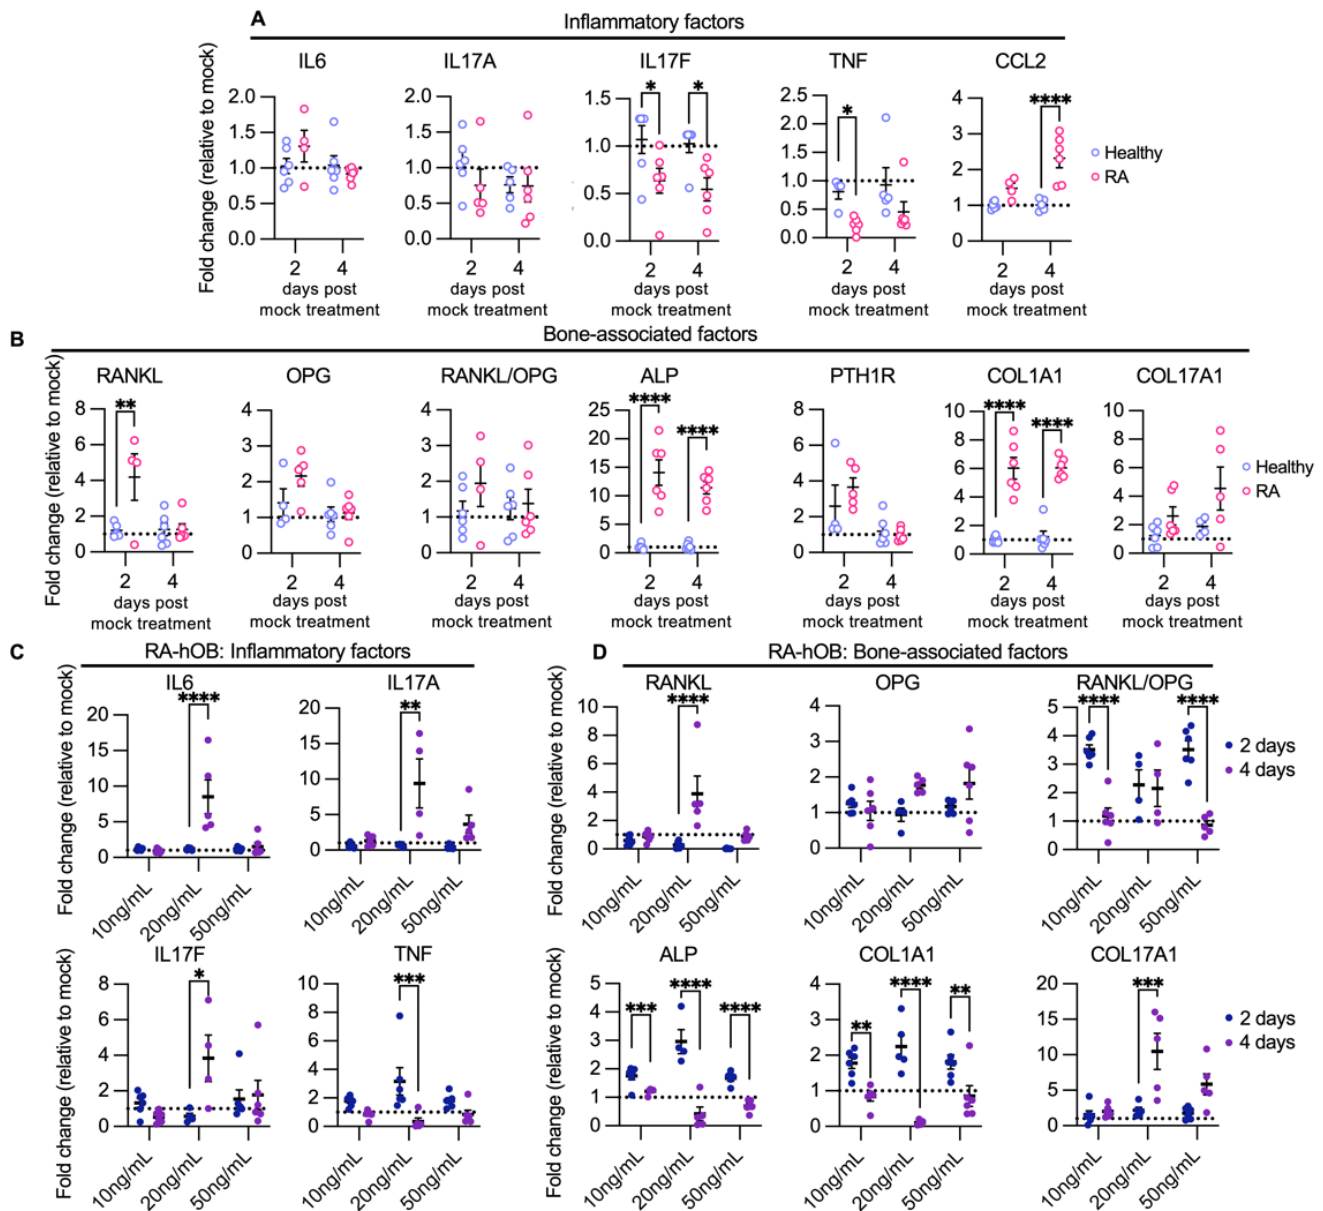

**Supplemental figure 2. SARS-CoV-2 ORF8 dose-dependent effect in RA osteoblasts. (A and B)**

Transcriptional profile of inflammatory factors (**A**) and bone-associated factors (**B**) in H-hOBs and RA-hOBs treated with media (mock-treated controls)  $n = 4-6$  per group. (**C and D**) Transcriptional profile of inflammatory factors (**C**) and bone-associated factors (**D**) in H-hOBs and RA-hOBs stimulated with 20 ng/mL of purified SARS-CoV-2 ORF8, relative to mock-treated controls  $n = 4-6$  per group. Data are represented as means  $\pm$  SEM. Statistical analysis was performed using two-way ANOVA, and Bonferroni's multiple comparisons test. Data were generated from three independent experiments. Significant differences among groups are displayed with asterisks (\* $P < 0.05$ , \*\* $P < 0.01$ , \*\*\* $P < 0.001$  and \*\*\*\* $P < 0.0001$ ).

**Supplemental Table 1. Summary of types of IMID conditions and ORF8 positivity from COVID-19 with IMID cohort**

| IMID Conditions                 | COVID + IMID Patients |         |        |        |       |       |       |       |       |       |       |      |      |
|---------------------------------|-----------------------|---------|--------|--------|-------|-------|-------|-------|-------|-------|-------|------|------|
|                                 | #1                    | #2      | #3     | #4     | #5    | #6    | #7    | #8    | #9    | #10   | #11   | #12  | #13  |
| Giant cell arteritis            |                       | ✓       |        |        |       |       |       | ✓     |       |       |       |      |      |
| Polymyalgia rheumatica          |                       |         |        |        |       |       | ✓     |       |       |       |       |      |      |
| Psoriatic arthritis             | ✓                     |         |        |        |       |       |       |       |       |       |       |      |      |
| Pyoderma gangrenosum            |                       |         | ✓      |        |       |       |       |       |       |       |       |      |      |
| Raynaud's disease               |                       |         |        |        |       |       |       |       |       |       |       | ✓    |      |
| Rheumatoid arthritis            | ✓                     |         |        |        |       | ✓     |       |       |       |       |       |      | ✓    |
| Scleroderma                     |                       |         |        |        |       |       |       |       | ✓     |       | ✓     |      |      |
| Sjögren's syndrome              | ✓                     |         |        |        |       |       |       |       |       | ✓     |       | ✓    |      |
| Systemic lupus erythematosus    |                       |         |        | ✓      |       |       |       |       |       |       |       | ✓    | ✓    |
| Wegener's granulomatosis        |                       |         |        |        | ✓     |       |       |       |       |       |       |      |      |
| ORF8 positivity                 | +                     | +       | +      | +      | +     | +     | +     | -     | -     | -     | -     | -    | -    |
| ORF8 level (ng/mL) <sup>A</sup> | 2376.33               | 1000.66 | 504.79 | 173.21 | 95.40 | 90.15 | 84.85 | 33.11 | 31.13 | 23.17 | 14.83 | 8.10 | 7.24 |

<sup>A</sup>Samples with >50 ng/mL ORF8 detected were considered ORF8 positive.

**Supplemental Table 2. qPCR list of primers used in this study**

| <b>Gene</b>       | <b>Sequence (5' - 3')</b>     | <b>Species</b> |
|-------------------|-------------------------------|----------------|
| <i>GAPDH-F</i>    | ACCAGGTGGTCTCCTCTGAC          | human          |
| <i>GAPDH-R</i>    | TGTAGCCAAATTCGTTGTATACC       | human          |
| <i>IL6-F</i>      | CGAGCCCACCGGGAACGAAA          | human          |
| <i>IL6-R</i>      | GGACCGAAGGCGTTGTGGAG          | human          |
| <i>IL17A-F</i>    | AATCTCCACCGCAATGAGGA          | human          |
| <i>IL17A-R</i>    | ACGTTCCCATCAGCGTTGA           | human          |
| <i>IL17F-F</i>    | AACCAGCGCGTTTCCATGTCAC        | human          |
| <i>IL17F-R</i>    | GAGCATTGATGCAGCCCAAGTTC       | human          |
| <i>TNF-F</i>      | CGCCGTCTCCTACCAGACCAAGGTCAAC  | human          |
| <i>TNF-R</i>      | ATGATCCCAAAGTAGACCTGCCAGACTCG | human          |
| <i>CCL2-F</i>     | AGTCTCTGCCGCCCTTCT            | human          |
| <i>CCL2-R</i>     | GTGACTGGGGCATTGATTG           | human          |
| <i>RANKL-F</i>    | TGGATCACAGCACATCAGAGCAG       | human          |
| <i>RANKL-R</i>    | TGGGGCTCAATCTATATCTCGAAC      | human          |
| <i>OPG-F</i>      | GTGTGCGAATGCAAGGAAGG          | human          |
| <i>OPG-R</i>      | CCACTCCAAATCCAGGAGGG          | human          |
| <i>ALP-F</i>      | ACAAGCACTCCCCTTCATCTGGA       | human          |
| <i>ALP-R</i>      | TCACGTTGTTCTGTTTCAGCTCGT      | human          |
| <i>PTH1R-F</i>    | TCACCGTAGCTGTGCTCATCCT        | human          |
| <i>PTH1R-R</i>    | GAGTAGAGCACAGCGTCCTTGA        | human          |
| <i>COL1A1-F</i>   | CTCCTGACGCACGGCC              | human          |
| <i>COL1A1-R</i>   | CCGTTCTGTACGCAGGTGATT         | human          |
| <i>COL17A1-F</i>  | GCTCTTGGCATTCTAGTGGTC         | human          |
| <i>COL17A1-R</i>  | GATGTACTGCTGAATCTCCTGGC       | human          |
| <i>GAPDH-F</i>    | AGGTCATCCCAGAGCTGAACG         | mouse          |
| <i>GAPDH-R</i>    | CACCCTGTTGTGTAGCCGTAT         | mouse          |
| <i>OC-STAMP-F</i> | ATGAGGACCATCAGGGCAGCCACG      | mouse          |
| <i>OC-STAMP-R</i> | GGAGAAGCTGGGTCACTAGTTCGT      | mouse          |
| <i>DC-STAMP-F</i> | ACTAGAGGAGAAGTCTGGGAGTC       | mouse          |
| <i>DC-STAMP-R</i> | CACCCACATGTAGAGATAGGTCAG      | mouse          |
| <i>NFATC1-F</i>   | CCCGTCACATTCTGGTCCAT          | mouse          |
| <i>NFATC1-F</i>   | CAAGTAACCGTGTAGCTGCACAA       | mouse          |
| <i>RANK-F</i>     | TTTGTGGAATTGGGTCAATGAT        | mouse          |
| <i>RANK-R</i>     | ACCTCGCTGACCAGTGTGAA          | mouse          |
| <i>CTSK-F</i>     | AGGCAGCTAAATGCAGAGGGTACA      | mouse          |
| <i>CTSK-R</i>     | AGCTTGCATCGATGGACACAGAGA      | mouse          |
| <i>CALCR-F</i>    | CGCATCCGCTTGAATGTG            | mouse          |
| <i>CALCR -R</i>   | TCTGTCTTTCCCAGGAAATGA         | mouse          |
| <i>IL17A-F</i>    | GCCCTCAGACTACCTCAACC          | mouse          |
| <i>IL17A-R</i>    | GTCCTAGTAGGGAGGTGTGAAGTTG     | mouse          |
| <i>IL17F-F</i>    | AATCCAGAACCGCTCCAGT           | mouse          |
| <i>IL17F-R</i>    | TTGATGCAGCCTGAGTGTCT          | mouse          |
| <i>TNF-F</i>      | TCTGTCTACTGAACCTCGGGGTG       | mouse          |
| <i>TNF-R</i>      | ACTTGGTGGTTTGTACGACG          | mouse          |
| <i>CCL2-F</i>     | TCTCCAGCCTACTCATTGGG          | mouse          |
| <i>CCL2-R</i>     | AGGTCCTGTCTGCTTCTG            | mouse          |
